# Supplementary material for: Excess Sludge Disintegration by Discharge Plasma Coupled with Thiosulfate
Source: MDPI journal article supplement (doi:10.3390/w15183313), 2023-09-20
Supplement: s1 [file s1]

---

## Supporting Information

### Excess sludge disintegration by discharge plasma coupled with thiosulfate

Hekai Jin<sup>1,4#</sup>, Song Lin<sup>2#</sup>, Yueyun Yang<sup>1,4</sup>, Zhixin Liang<sup>1,4</sup>, Yiqi Chen<sup>1,4</sup>, Lei Hua<sup>1,4</sup>,

Ying Zhang<sup>3</sup>, Hongtao Jia<sup>5</sup>, Guodong Zhang<sup>1,4\*</sup>, Tiecheng Wang<sup>1,4\*</sup>

<sup>1</sup>College of Natural Resources and Environment, Northwest A&F University,  
Yangling, Shaanxi Province 712100, PR China

<sup>2</sup>Wuchang University of Science and Technology, Wuhan, Hubei Province, PR China

<sup>3</sup>College of Information Science and Technology, Nanjing Forestry University,  
Nanjing 210037, China

<sup>4</sup>Key Laboratory of Plant Nutrition and the Agri-environment in Northwest China,  
Ministry of Agriculture, Yangling, Shaanxi 712100, PR China

<sup>5</sup>College of Resources and Environment, Xinjiang Agricultural University, Urumqi  
830052, China

# Jin and Lin contributed equally to this study

\*Corresponding author: Tiecheng Wang, Guodong Zhang E-mail:

wangtiecheng2008@126.com; 947596309@qq.com

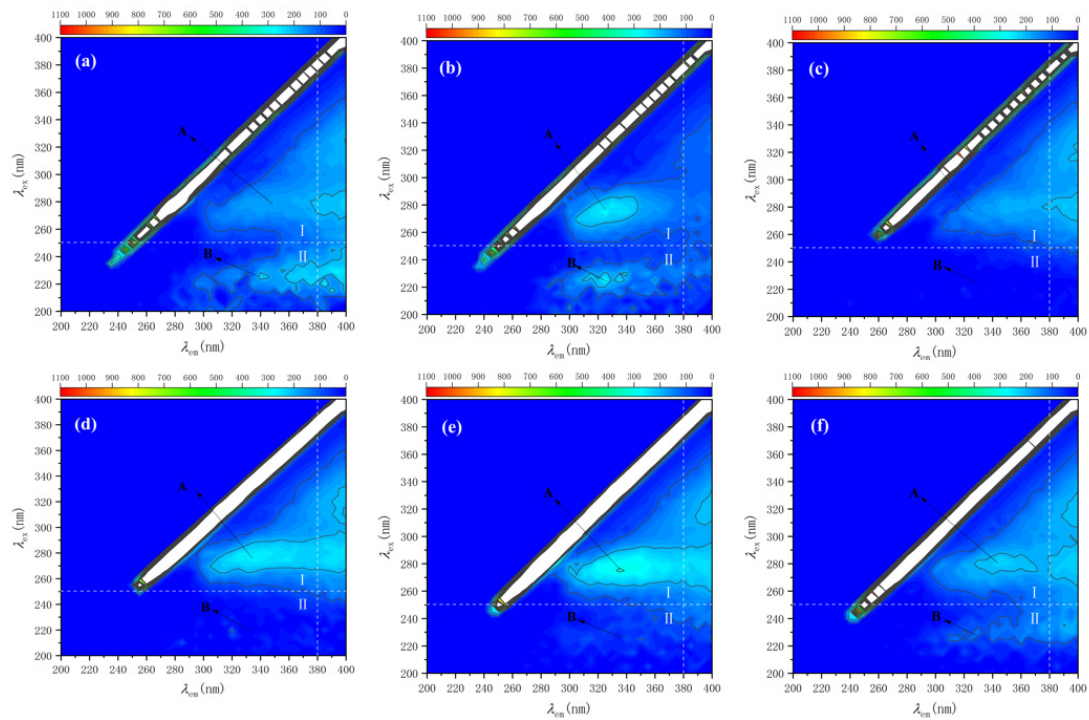

**Figure S1.** 3D-EEM of S-EPS (a: Raw sludge; b: plasma treatment for 20 min; c-f: discharge plasma coupled with TSA treatment for 5, 10, 15, and 20 min, respectively).

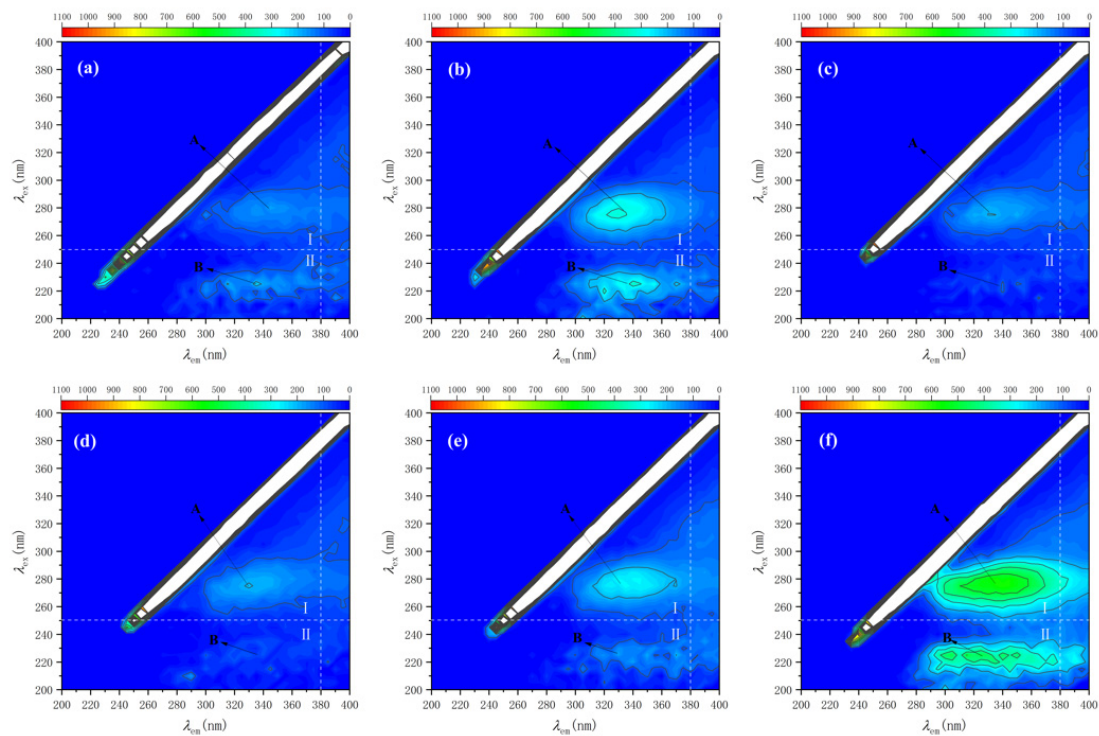

**Figure S2.** 3D-EEM of LB-EPS (a: Raw sludge; b: plasma treatment for 20 min; c-f: discharge plasma coupled with TSA treatment for 5, 10, 15, and 20 min, respectively).

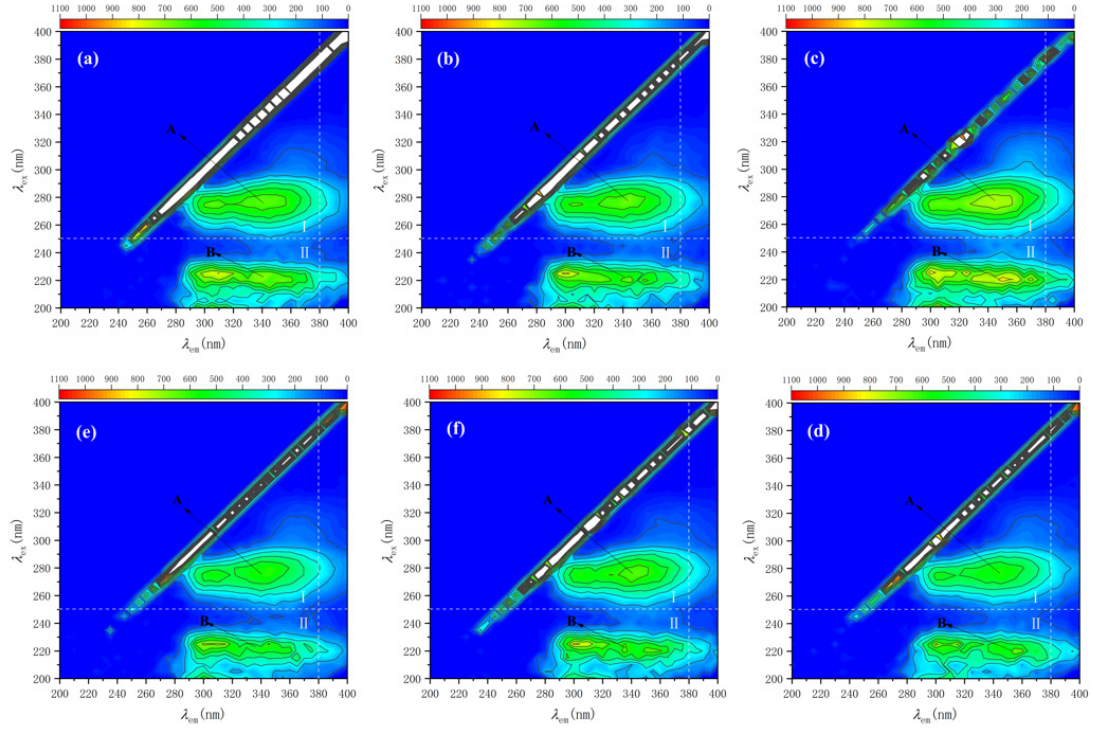

**Figure S3.** 3D-EEM of TB-EPS (a: Raw sludge; b: plasma treatment for 20 min; c-f: discharge plasma coupled with TSA treatment for 5, 10, 15, and 20 min, respectively).
