# Supplementary material for: Excess Sludge Disintegration by Discharge Plasma Coupled with Thiosulfate
Source: MDPI journal article supplement (doi:10.3390/w15183313), 2023-09-20
Supplement: s1 [file s1]

Archive with 1 entries (1 files):
- water-2584347-supplementary.pdf
